# Supplementary material for: A Vector-Based Method to Analyze the Topography of Glial Networks
Source: MDPI journal article supplement (doi:10.3390/ijms20112821), 2019-06-10
Supplement: s1 [file s1]

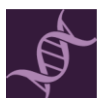

1

**Supplementary Table 1.** Distribution of classes.

| <b>Approach</b>         | <b>Oval (orthogonal<br/>to tonotopic axis)</b> | <b>Spherical</b> | <b>Oval (along to<br/>tonotopic axis)</b> |
|-------------------------|------------------------------------------------|------------------|-------------------------------------------|
| YX ratio (manual)       | 63%                                            | 29%              | 8%                                        |
| YX ratio (automatic)    | 54%                                            | 33%              | 13%                                       |
| Intensity + coordinates | 79%                                            | 8%               | 13%                                       |
| Intensity profiles      | 46%                                            | 54%              | 0%                                        |
| Vector means            | 58%                                            | 38%              | 4%                                        |

2

The “Vector sum” approach is omitted here, as its results are not based on ratios.  $n = 24$  slices/19 animals.
